# Supplementary material for: Automated Detection of Microseismic Arrival Based on Convolutional Neural Networks
Source: Hindawi journal article supplement (doi:10.1155/2022/8000477), 2022-12-03
Supplement: f1 [file 8000477.f1.zip]

Archive with 10 entries (10 files):
- AE data acc200 epoch.png
- AE(Unet pick up).png
- Beijing software acoustic emission software (test use).png
- MS data.png
- MS(Unet pick up).png
- Test of microseismic analysis software jointly developed by c# and python in Sanmenxia Yima Coal Mine and Zhengzhou Xinmi coal mine.png
- Time to pick up software written in c# (written by changhaoyuan).png
- U-net training process written in python (written by Chang Haoyuan).png
- Use Excel to process the arrival data and positioning results.png
- Visualization when u-net picks up.png
