# Supplementary figures and images for: Automated Detection of Microseismic Arrival Based on Convolutional Neural Networks
Source: Hindawi journal article supplement (doi:10.1155/2022/8000477), 2022-12-03

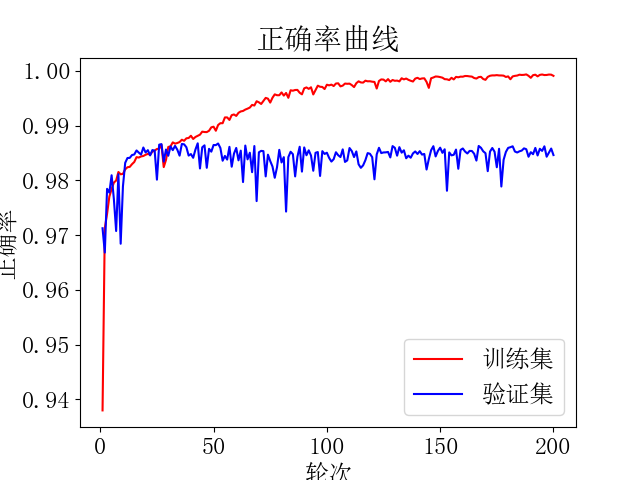

Supplement: f1 [file 8000477.f1.zip › AE data acc200 epoch.png]

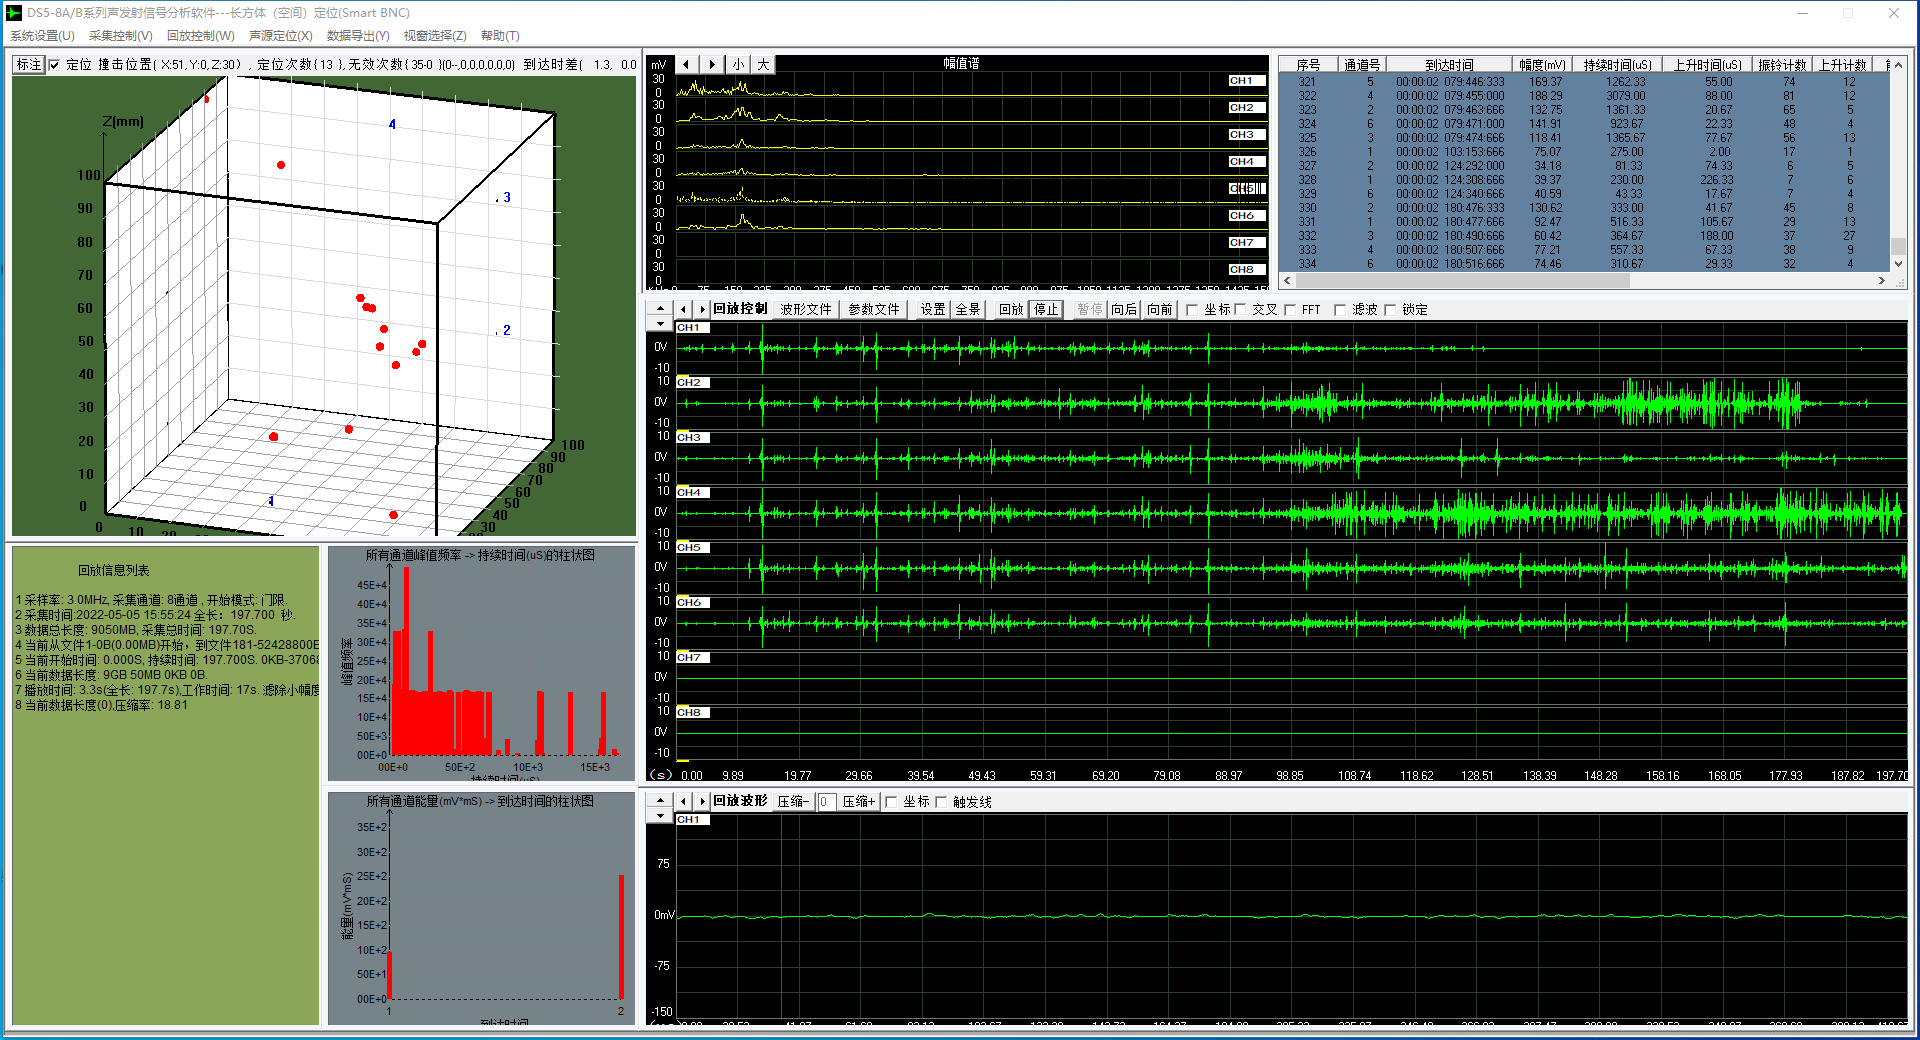

Supplement: f1 [file 8000477.f1.zip › Beijing software acoustic emission software (test use).png]

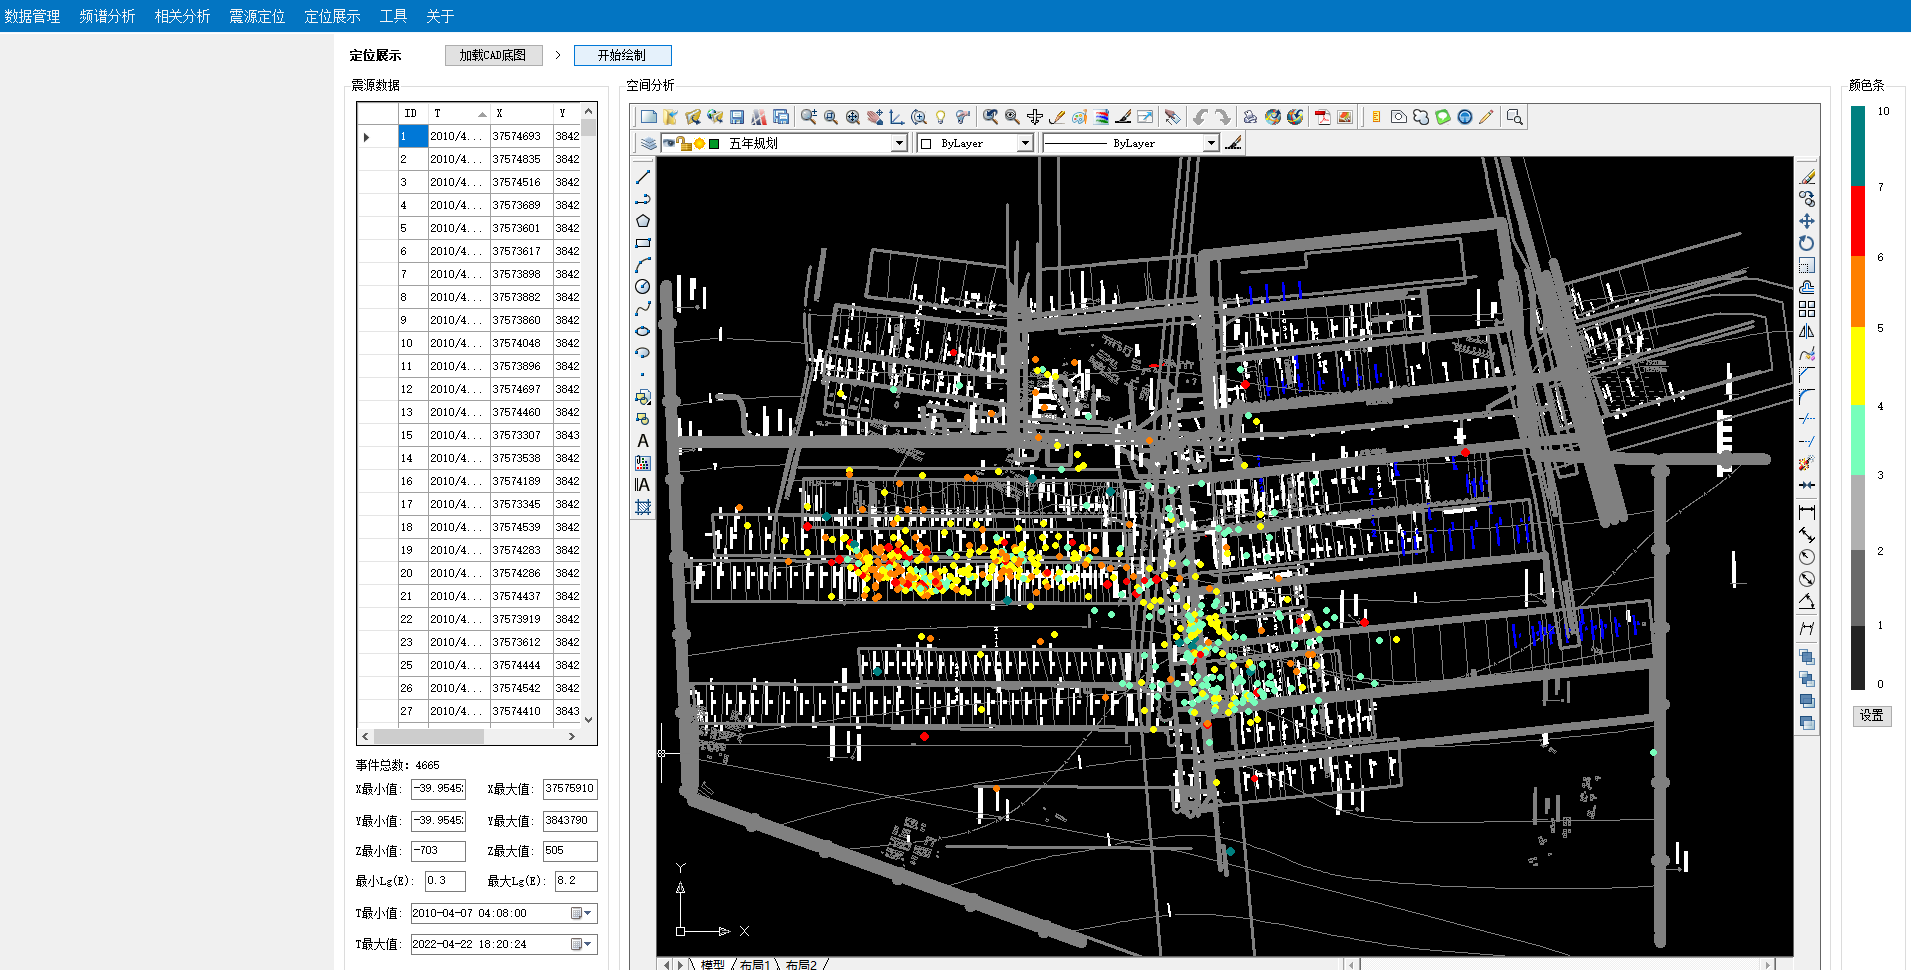

Supplement: f1 [file 8000477.f1.zip › Test of microseismic analysis software jointly developed by c# and python in Sanmenxia Yima Coal Mine and Zhengzhou Xinmi coal mine.png]

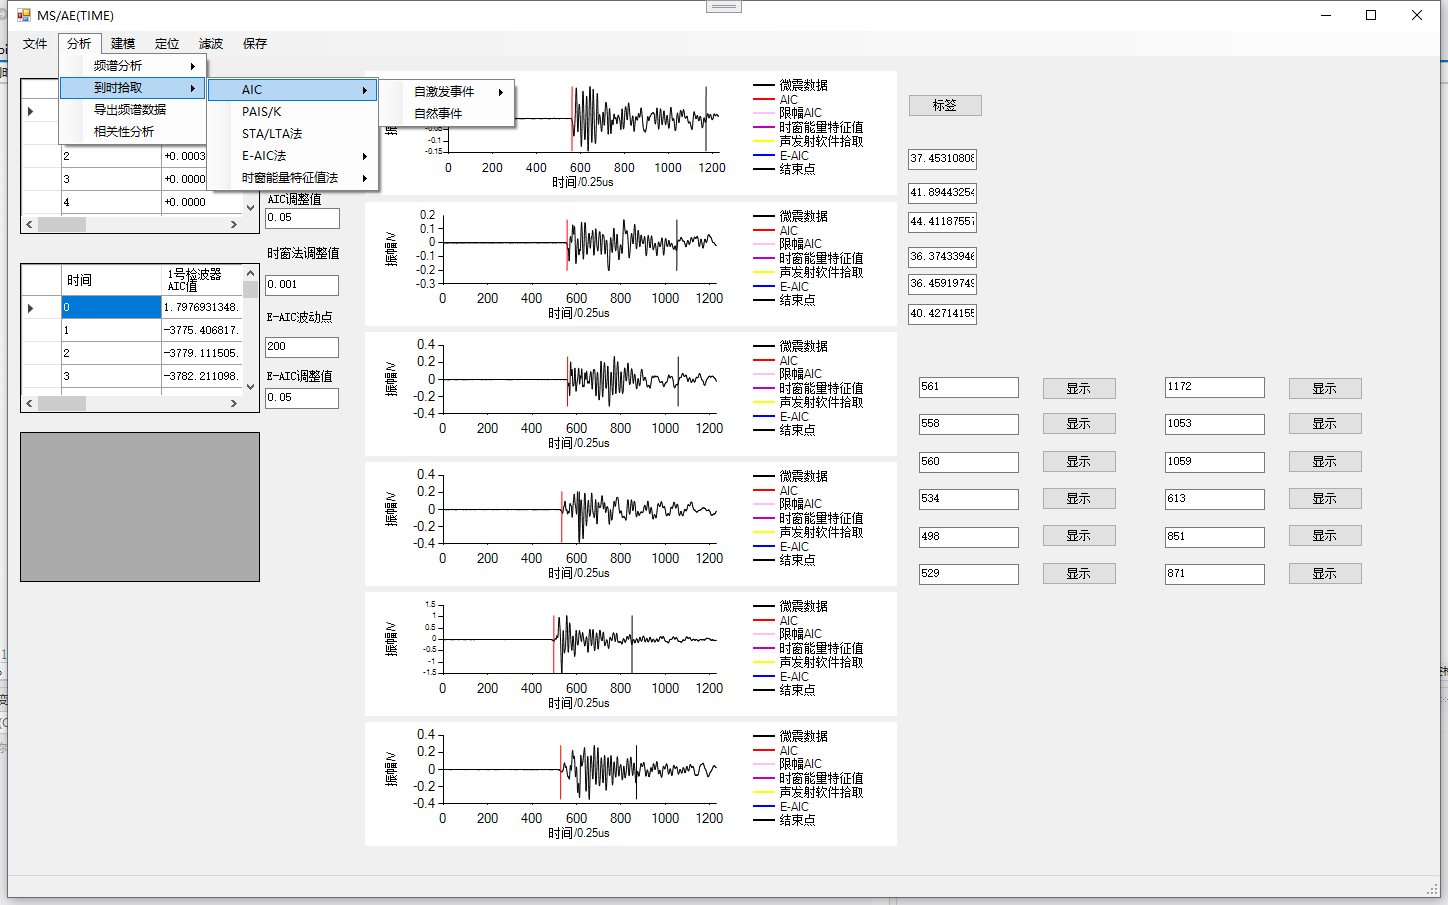

Supplement: f1 [file 8000477.f1.zip › Time to pick up software written in c# (written by changhaoyuan).png]

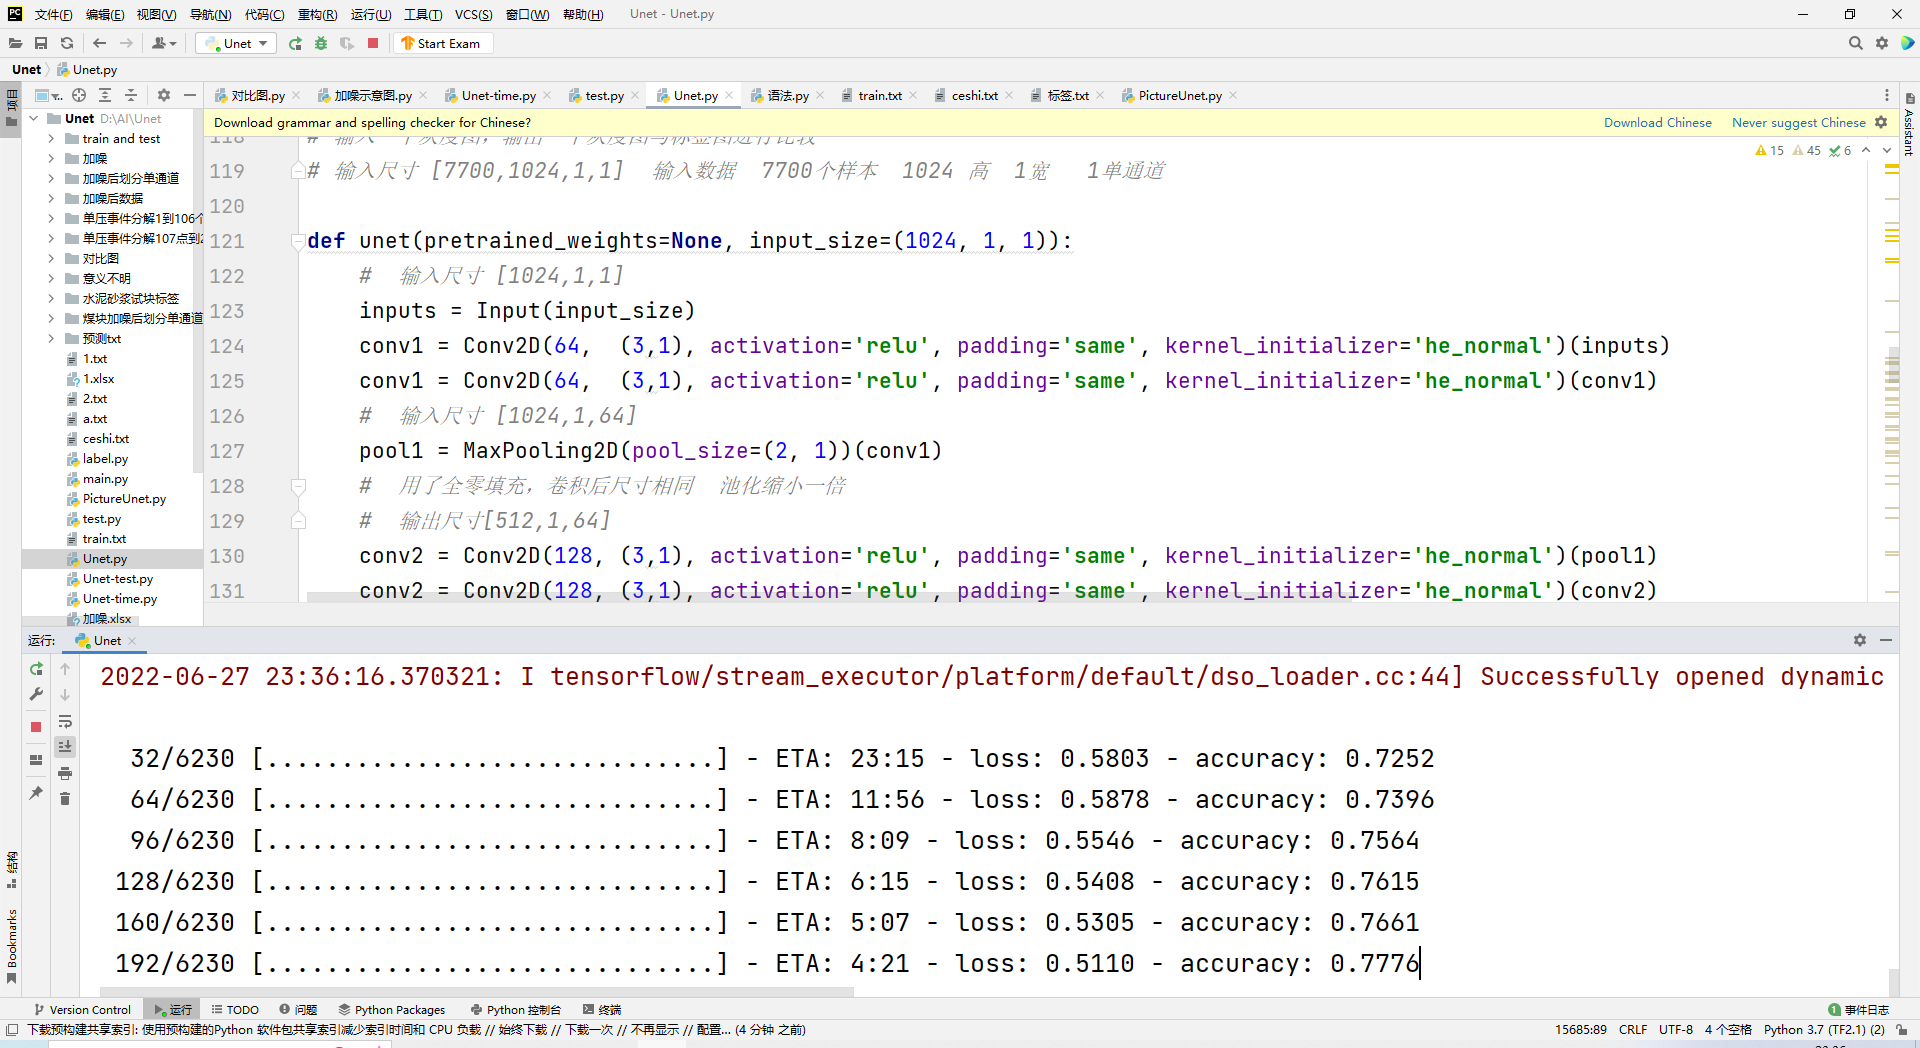

Supplement: f1 [file 8000477.f1.zip › U-net training process written in python (written by Chang Haoyuan).png]

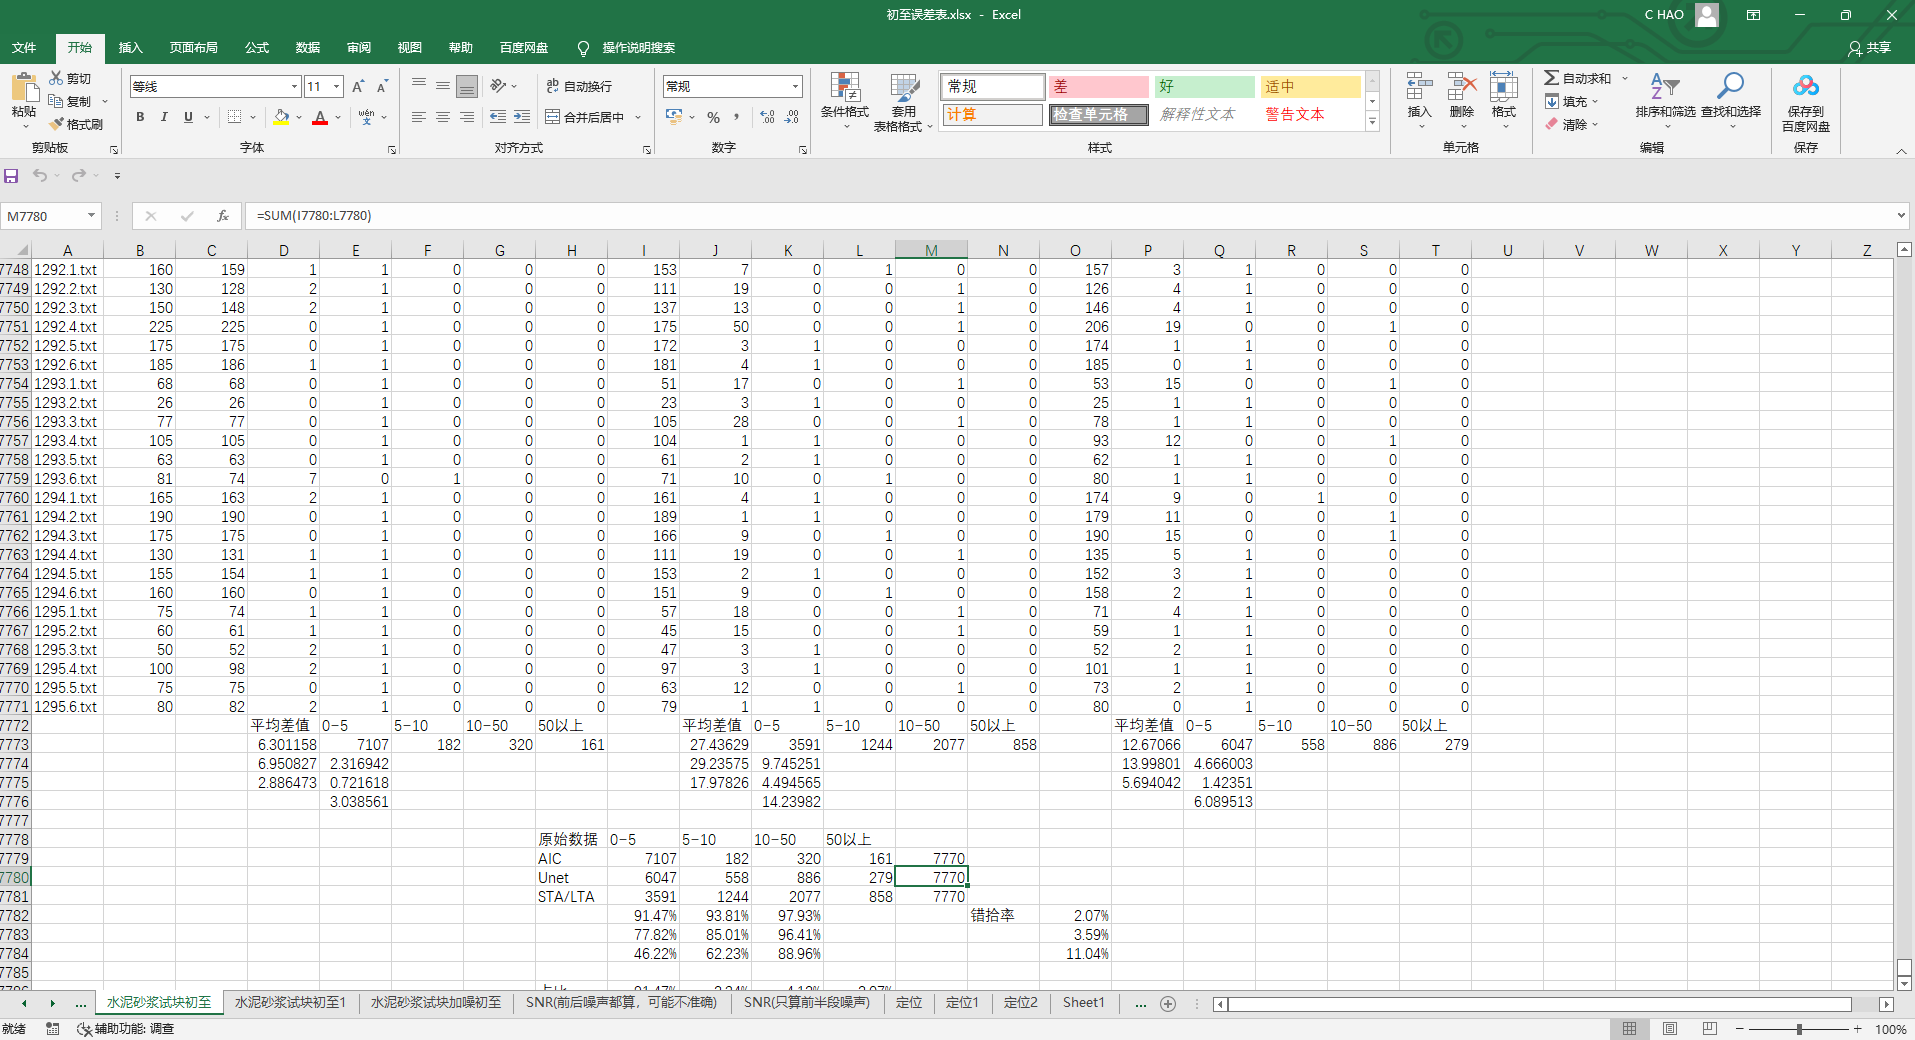

Supplement: f1 [file 8000477.f1.zip › Use Excel to process the arrival data and positioning results.png]

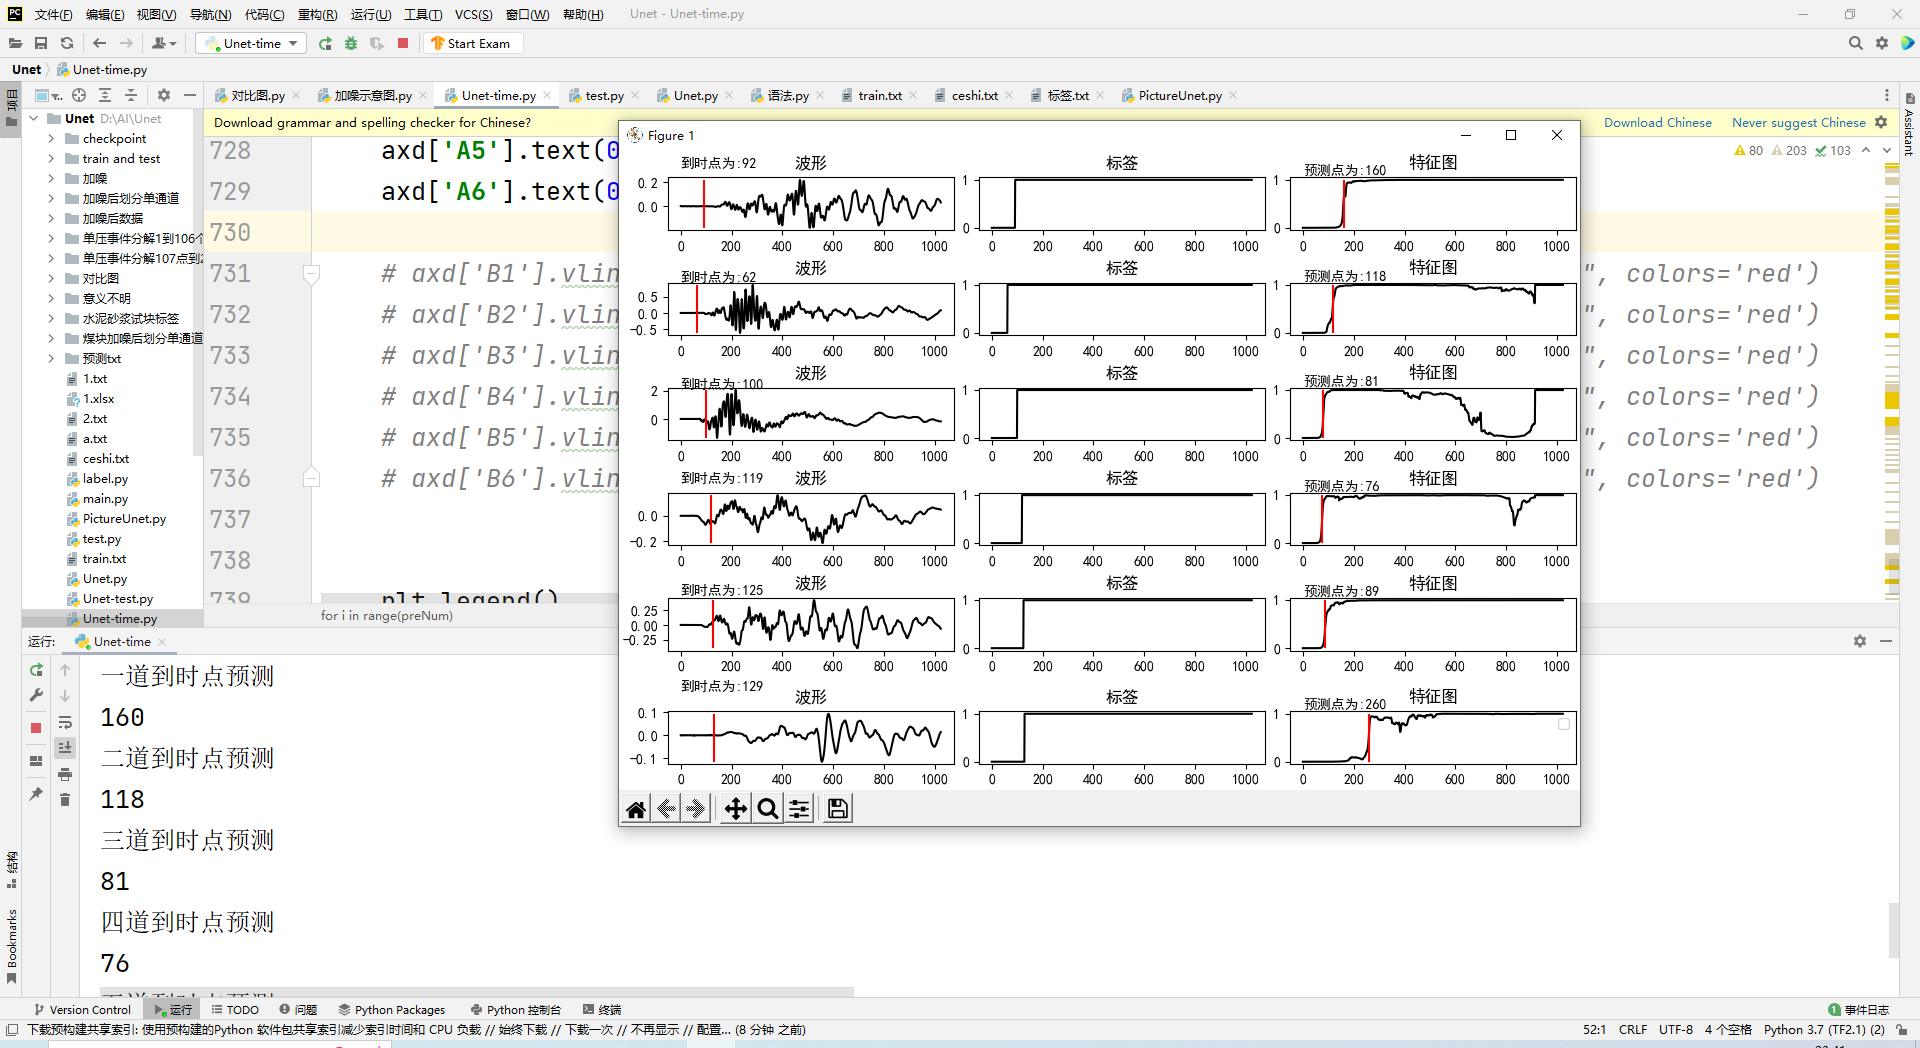

Supplement: f1 [file 8000477.f1.zip › Visualization when u-net picks up.png]
